# Supplementary material for: The Structural Biology of Septins and Their Filaments: An Update
Source: PubMed Central journal article supplement (PMC8640212; doi:10.3389/fcell.2021.765085), 2021-11-19
Supplement: DataSheet1.pdf [file DataSheet1.pdf]

## *Supplementary Material*

### **1. Supplementary Figures**

(this page was intentionally left blank)

Supplementary Material

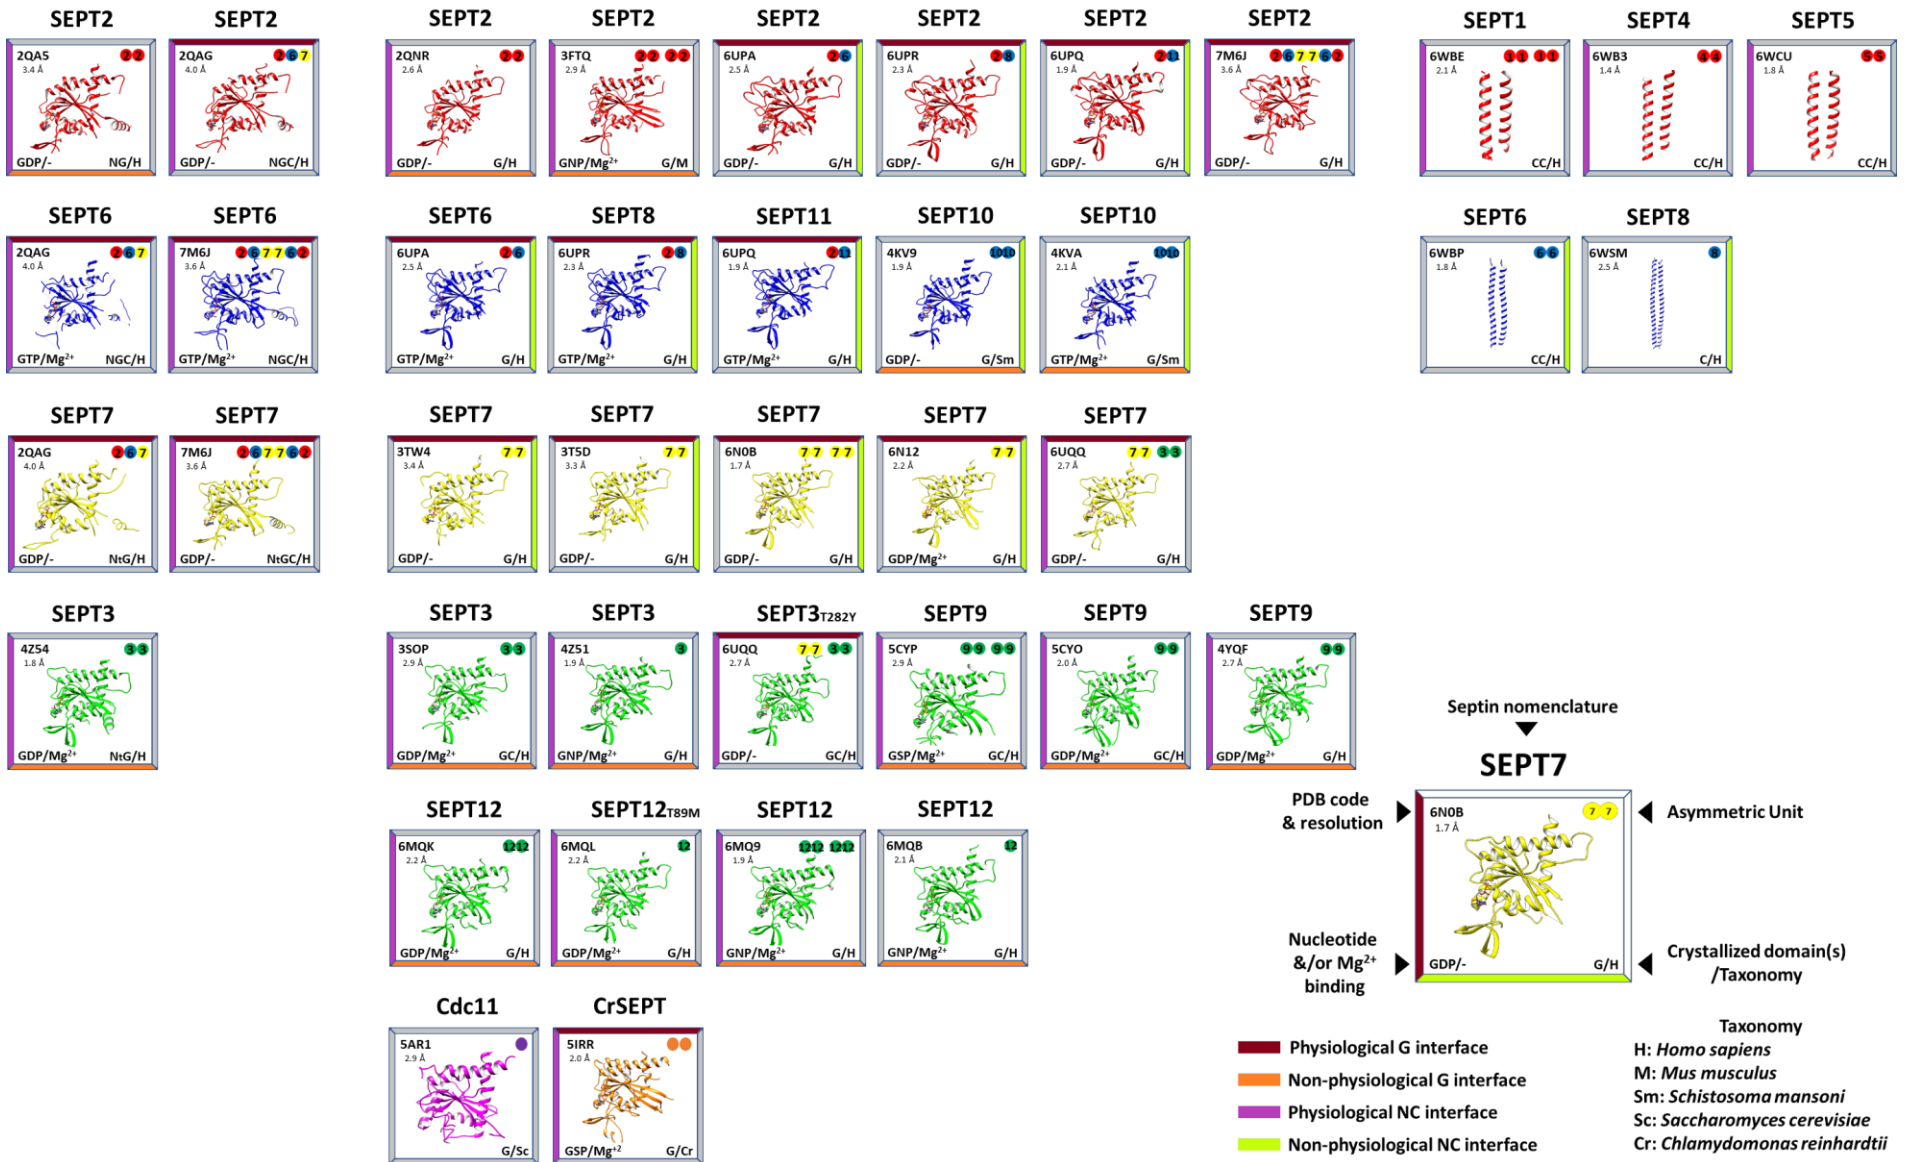

**Supplementary Figure 1.** The “Septin Chart” including all septin structures published to date. The square sides which enclose each structure are coloured according to the presence of each interface: left side, physiological G-interface (burgundy); right side, physiological NC-interface (purple); upper side, non-physiological G-interface (orange); lower side, non-physiological NC-interface (lime); i.e., the indications of physiological interfaces are related to the pose in which the monomer is depicted (left, G-side; right, NC-side). Domain acronyms: N, N-terminal domain; Nt, truncated N-terminal domain; G, GTP-binding domain; C, C-terminal domain; CC, coiled coil. PDB:6MQ9 and PDB:5CYO should be preferred over PDB:6MQB and PDB:4YQF since they represent resolution-improved models.

**A**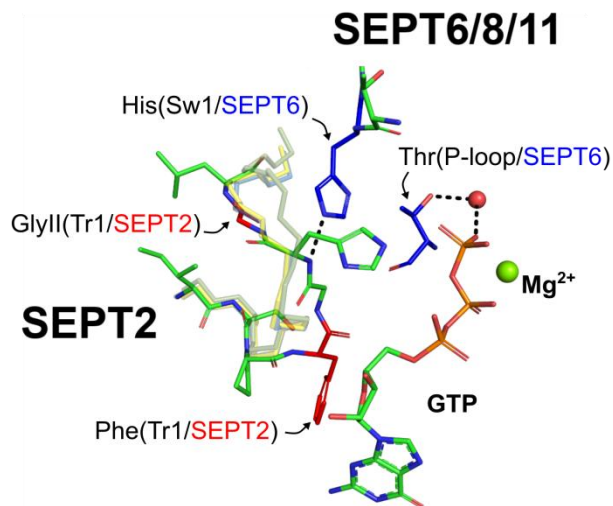**B**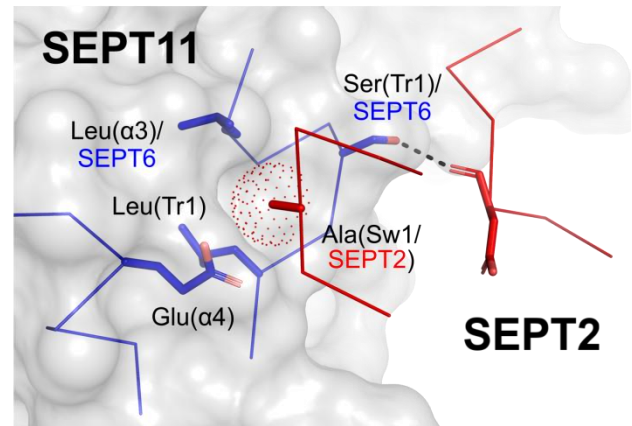

**Supplementary Figure 2.** Group-specificities within the G-interface formed by SEPT6-group members with SEPT2. *Characteristic* amino acids are coloured in blue (SEPT6 group) or red (SEPT2). **(A)** 3D structure showing how His(Sw1/SEPT6) interacts with the *trans*-loop 1 of SEPT2. The *characteristic* amino acids allow *trans*-loop 1 to adopt a different orientation from that seen in septins from other groups (transparent traces with SEPT3 in light green, SEPT7 yellow and SEPT11 in light blue). **(B)** The SEPT2 switch I region interacting with a cavity in SEPT11. The methyl of the *characteristic* amino acid Ala(Sw1/SEPT2) fits into the cavity formed by the residues shown (PDB:6UPQ).

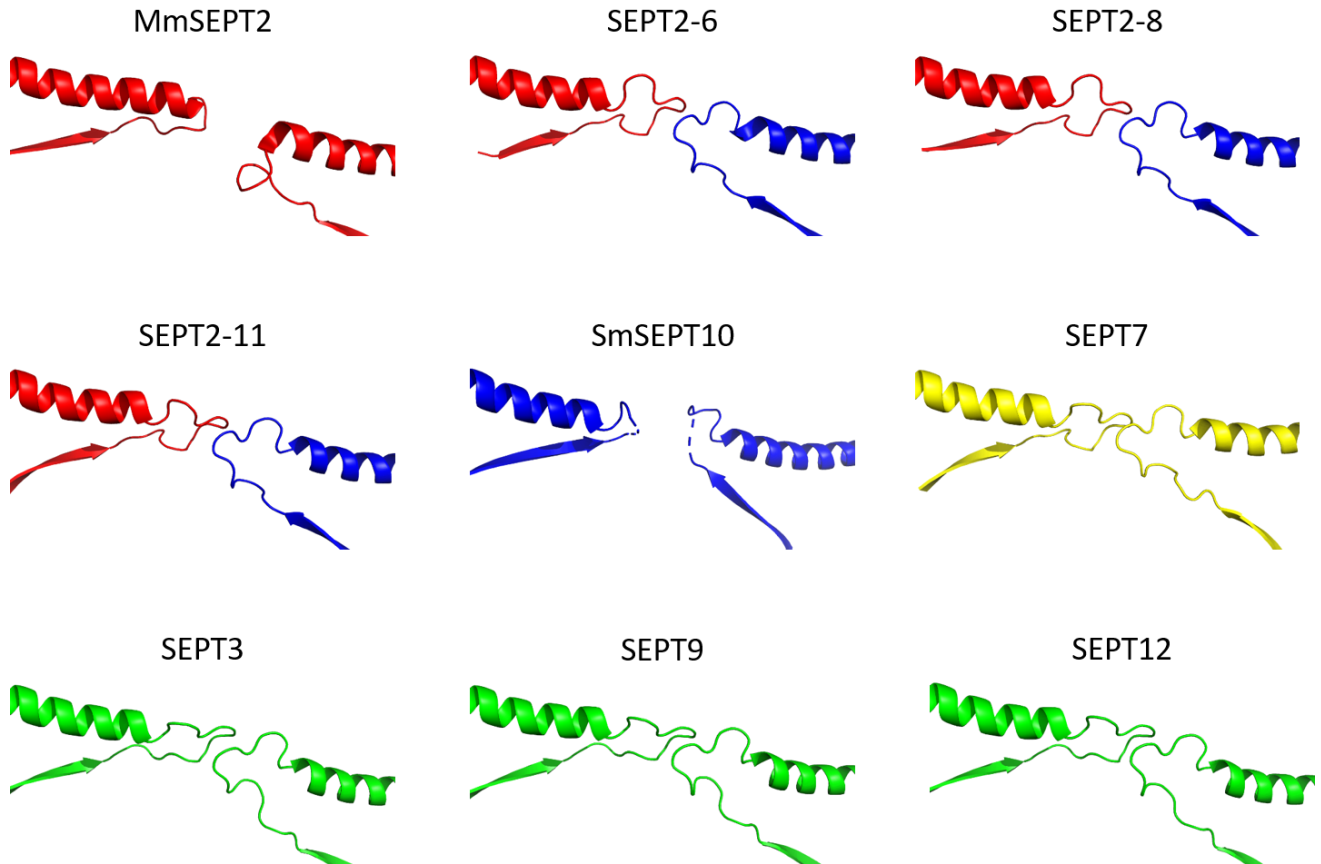

**Supplementary Figure 3.** Switch II organization in various septin structures. PDB IDs in reading order: PDB:3FTQ, PDB:6UPA, PDB:6UPR, PDB:6UPQ, PDB:4KV9, PDB:6N12, PDB:4Z54, PDB:5CYO and PDB:6MQK.



## Cdc3C

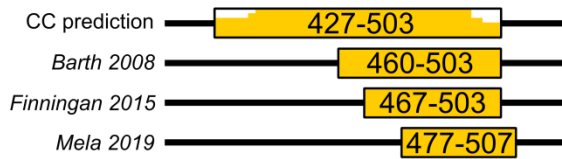

## Cdc12C

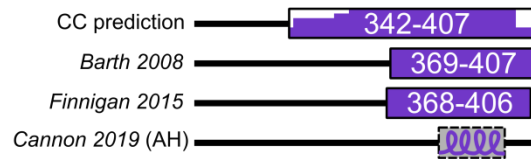

## Cdc11C

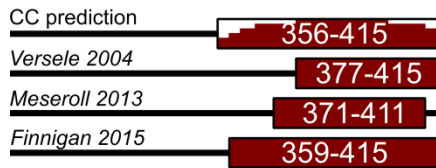

## Shs1C

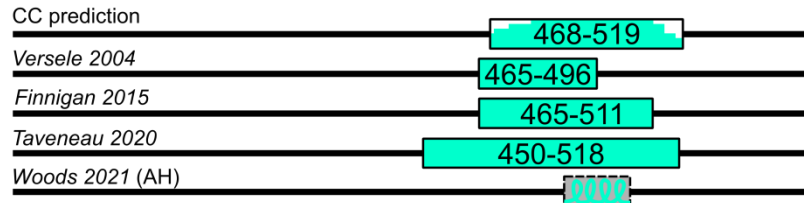

**Supplementary Figure 5.** Coiled coils (CCs) in baker's yeast (*Saccharomyces cerevisiae*) septins. Cdc10 have a short C-domain, no coiled-coil prediction and is not shown. CC region used by authors, together with 'consensus' coiled-coil predictions by COILS, Marcoil, DeepCoil and DeepCoil2. The degree of agreement in coiled-coil prediction among the five algorithms (sliding windows of 21 and 28 residues was used in COILS) is represented as the height of colored blocks within the line "CC prediction". Amphipathic helices (AHs) are likely found in Cdc12 and Shs1 and are represented in a grey dashed box.

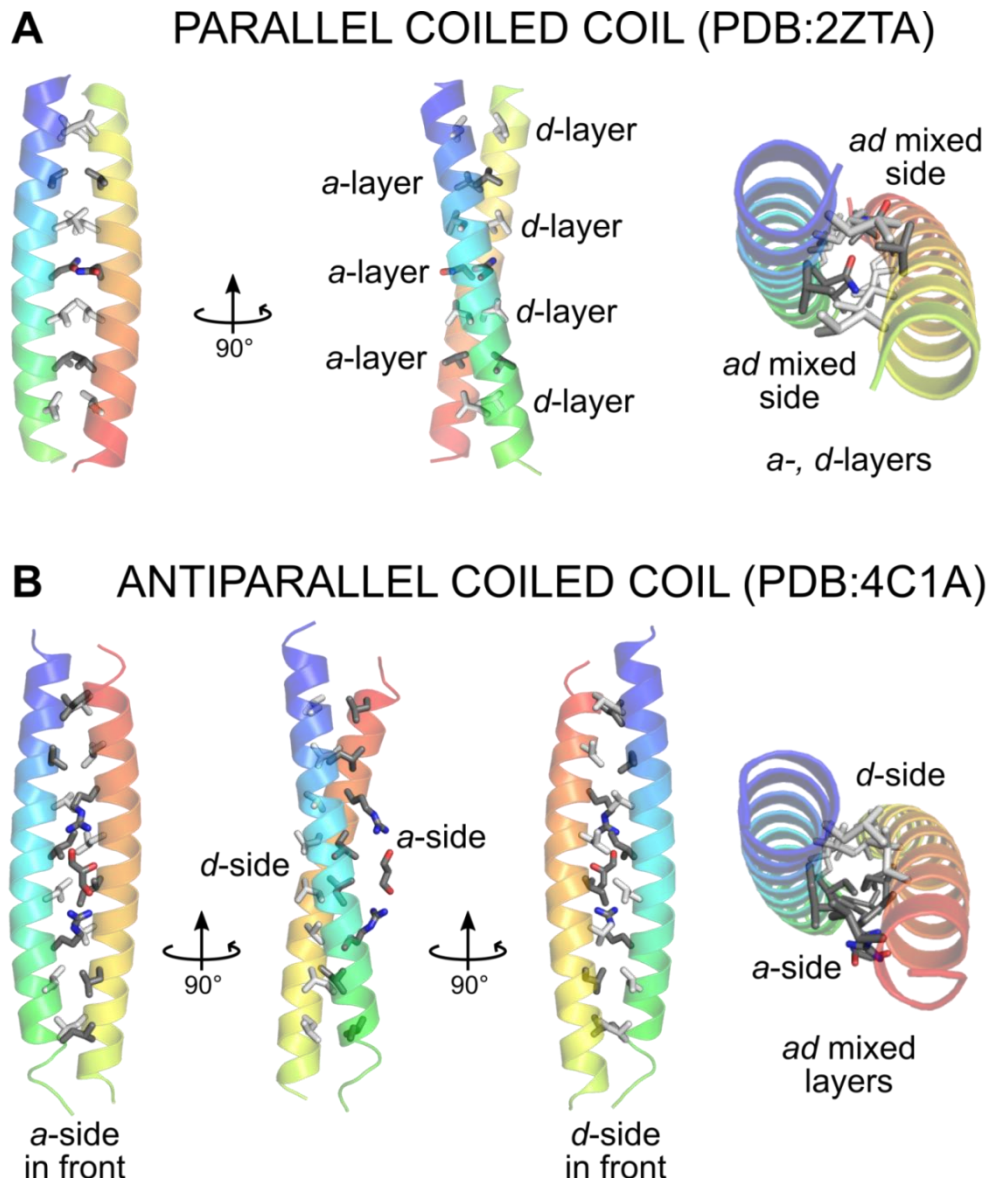

**Supplementary Figure 6.** Canonical dimeric coiled coils have distinct *a,d* layers/sides depending on the relative orientation of the helices. The *a* and *d* positions are represented in dark grey and white, respectively. **(A)** Parallel GCN4 coiled coil (PDB:2ZTA) has *a*-layers alternated with *d*-layers but *a,d*-mixed sides (e.g., *a* and *d* appear in both sides of the coiled coil). **(B)** Antiparallel ZfL2-1 coiled coil (PDB:4C1A) has, on the other hand, exclusive sides for *a* and *d* but *a,d*-mixed layers (a layer being composed of the core positions on the same height of the coiled coil).



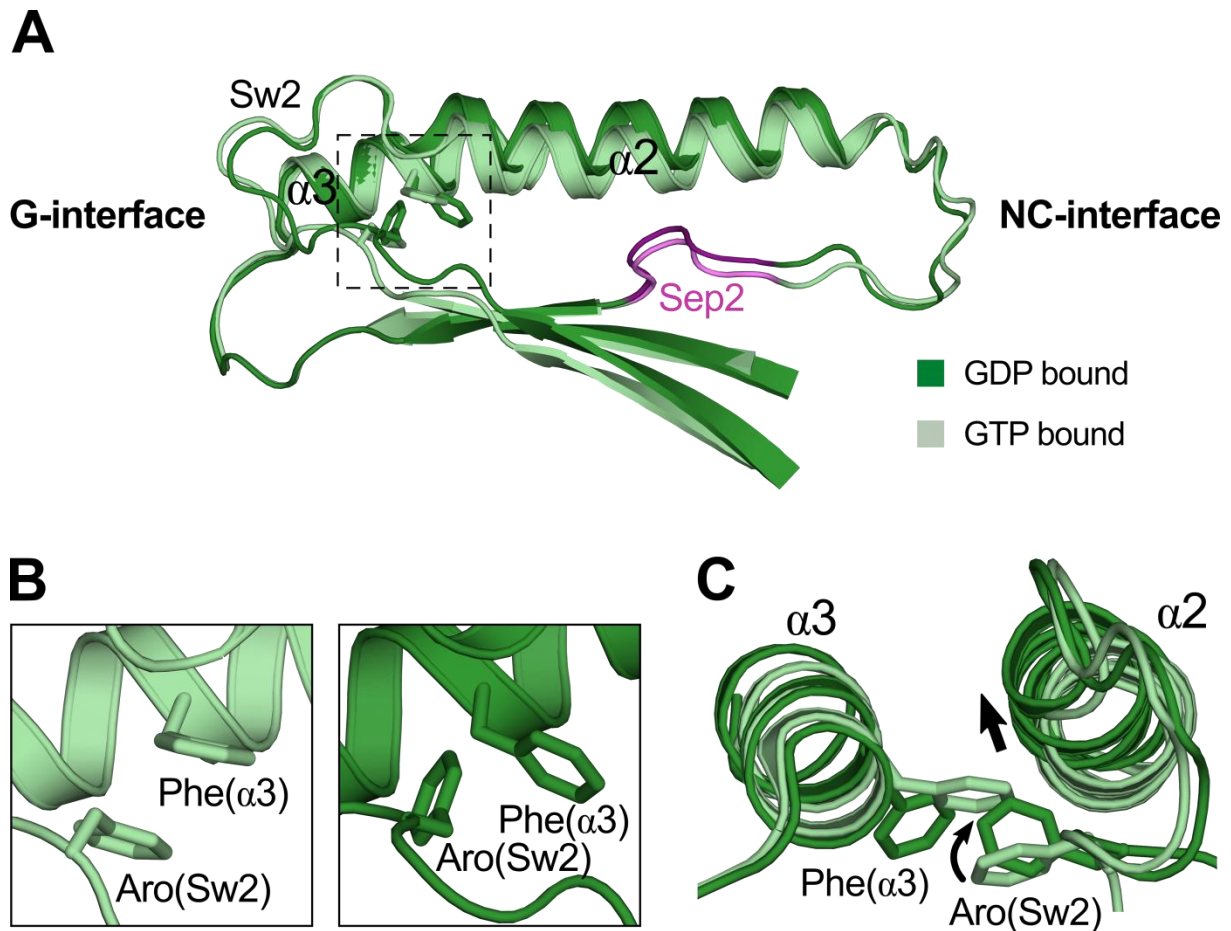

**Supplementary Figure 7.** Information transfer between adjacent interfaces and the likely role of Aro(Sw2) and Phe( $\alpha 3$ ). **(A)** Structural superposition of SEPT3 in the pre-hydrolysis (light green, SEPT3-GMPPNP, PDB:4Z51) and the post-hydrolysis (dark green, SEPT3<sub>T282Y</sub>-GDP, PDB:6UQQ) states. Note that the  $\alpha 2$  helix in the latter is slightly farther away from the  $\beta$ -sheet and Sep2 (highlighted in purple). Despite the model complexed with the GTP analogue (light green) does not form physiological G-interfaces within the crystal, the ordering of switch II indicates a *quasi*-physiological G-interface and represents at this moment the best possible model for the pre-hydrolysis state. **(B)** Snapshots of the aromatic cluster in the pre- and in the post-hydrolysis states. **(C)** Orientation seen from the G-interface. The rearrangement of Aro(Sw2) forces the  $\alpha 2$  helix upwards.

## **2. Supplementary Tables**

(this page was intentionally left blank)

**Supplementary Table 1.** Positions of relevant amino acid residues within each human septin. The residue is stated where there is no conservation. Uniprot entries are displayed below each sequence name. Asterisks (\*) represent absent or unidentifiable positions.

| Structural position                 | Human septins      |                    |                    |                    |                    |                    |                    |                    |                    |                    |                    |                    |                    |
|-------------------------------------|--------------------|--------------------|--------------------|--------------------|--------------------|--------------------|--------------------|--------------------|--------------------|--------------------|--------------------|--------------------|--------------------|
|                                     | SEPT1<br>Q8WYJ6    | SEPT2<br>Q15019    | SEPT4<br>O43236    | SEPT5<br>Q99719    | SEPT7<br>Q16181    | SEPT6<br>Q14141    | SEPT8<br>Q92599-2  | SEPT10<br>Q9P0V9   | SEPT11<br>Q9NVA2   | SEPT14<br>Q6ZU15   | SEPT3<br>Q9UH03-2  | SEPT9<br>Q9UHD8-2  | SEPT12<br>Q8IYM1   |
| Gly(HL)                             | 12                 | 19                 | 126                | 26                 | 32                 | 24                 | 26                 | 48                 | 23                 | 34                 | 43                 | 262                | 31                 |
| Phe(HL)                             | 13                 | 20                 | 127                | 27                 | 33                 | 25                 | 27                 | 49                 | 24                 | 35                 | Ile                | Ile                | Ile                |
| Pro( $\alpha$ 0)                    | 17                 | 24                 | 131                | 31                 | 37                 | 29                 | 31                 | 53                 | 28                 | 39                 | Ile                | Leu                | Leu                |
| Phe( $\alpha$ 0)                    | 29                 | 36                 | 143                | 43                 | 49                 | 41                 | 43                 | 65                 | 40                 | 51                 | 60                 | 279                | 48                 |
| Glu(P-loop)                         | 38                 | 45                 | 152                | 52                 | 58                 | 50                 | 52                 | 74                 | 49                 | 60                 | Gln                | Gln                | Gln                |
| Thr(P-loop/SEPT6)                   | Ser                | Ser                | Ser                | Ser                | Ser                | 51                 | 53                 | 75                 | 50                 | 61                 | Ser                | Ser                | Ser                |
| Ser(P-loop)                         | 44                 | 51                 | 158                | 58                 | 64                 | 56                 | 58                 | 80                 | 55                 | 66                 | 75                 | 294                | 63                 |
| Ala(Sw1/SEPT2)                      | 64                 | 71                 | 178                | 78                 | Pro                | *                  | *                  | *                  | *                  | *                  | Arg                | Ser                | Leu                |
| His(Sw1/SEPT6)                      | *                  | *                  | *                  | *                  | *                  | 74                 | 76                 | 98                 | 73                 | 84                 | *                  | *                  | *                  |
| Thr(Sw1)                            | 71                 | 78                 | 185                | 85                 | 90                 | Gly                | Cys                | Asn                | Gly                | Asn                | 102                | 321                | 89                 |
| Asp(Sw2)                            | 94                 | 101                | 208                | 108                | 113                | Ser                | 103                | Asn                | 100                | Glu                | 125                | 344                | 112                |
| GlyI(Sw2)                           | 97                 | 104                | 211                | 111                | 116                | 104                | 106                | 128                | 103                | 114                | 128                | 347                | 115                |
| Aro(Sw2)                            | 98 <sup>Phe</sup>  | 105 <sup>Tyr</sup> | 212 <sup>Phe</sup> | 112 <sup>Phe</sup> | 117 <sup>Phe</sup> | 105 <sup>Phe</sup> | 107 <sup>Phe</sup> | 129 <sup>Phe</sup> | 104 <sup>Phe</sup> | 115 <sup>Tyr</sup> | 129 <sup>Phe</sup> | 348 <sup>Phe</sup> | 116 <sup>Phe</sup> |
| GlyII(Sw2)                          | 99                 | 106                | 213                | 113                | 118                | 106                | 108                | 130                | 105                | 116                | 130                | 349                | 117                |
| Asx(Sw2)                            | 103 <sup>Asp</sup> | 110 <sup>Asn</sup> | 217 <sup>Asn</sup> | 117 <sup>Asn</sup> | 122 <sup>Asp</sup> | 110 <sup>Asn</sup> | 112 <sup>Asn</sup> | 134 <sup>Asn</sup> | 109 <sup>Asn</sup> | 120 <sup>Asp</sup> | 134 <sup>Asn</sup> | 353 <sup>Asn</sup> | 121 <sup>Asn</sup> |
| Asn(Sw2)                            | Cys                | Cys                | 218                | 118                | 123                | Lys                | Lys                | Lys                | Lys                | Lys                | 135                | 354                | 122                |
| Glu( $\alpha$ 2)                    | 126                | 133                | 240                | 140                | 145                | 133                | 135                | 157                | 132                | 143                | 157                | 376                | 144                |
| Arg(PB2)                            | 131                | 138                | 245                | 145                | 150                | 138                | 160                | 162                | 137                | 148                | 162                | 381                | 149                |
| Phe(Tr1/SEPT2)                      | 149                | 156                | 263                | 163                | Ser                | Thr                | Thr                | Thr                | Thr                | Thr                | Thr                | Thr                | Thr                |
| GlyI(Tr1)                           | 150                | 157                | 264                | 164                | 169                | 159                | 161                | 183                | 158                | 169                | 182                | 401                | 169                |
| His(Tr1)                            | Arg                | 158                | 265                | 165                | 170                | 160                | 162                | 184                | 159                | 170                | 183                | 402                | 170                |
| GlyII(Tr1/SEPT2)                    | 152                | 159                | 266                | 166                | 171                | Ser                | Ser                | Ser                | Ser                | Ser                | Ser                | Ser                | Cys                |
| Leu(Tr1)                            | 153                | 160                | 267                | 167                | 172                | 162                | 164                | 186                | 161                | 172                | 185                | 404                | 172                |
| Ser(Tr1/SEPT6)                      | Pro                | Pro                | Pro                | Pro                | Pro                | 164                | 166                | Thr                | 163                | 174                | Pro                | Pro                | Pro                |
| Leu( $\alpha$ 3/SEPT6)              | Val                | Val                | Val                | Val                | Ile                | 167                | 169                | 191                | 166                | 177                | 190                | Ile                | Ile                |
| Phe( $\alpha$ 3)                    | 160                | 167                | 274                | 174                | 179                | Thr                | Thr                | Thr                | Thr                | Thr                | 192                | 411                | 179                |
| Asp(G4)                             | 178                | 185                | 292                | 192                | 197                | 187                | 189                | 211                | 186                | 197                | 210                | 429                | 197                |
| Glu(Tr2)                            | 184                | 191                | 298                | 198                | 203                | 193                | 195                | 217                | 192                | Asp                | 216                | 435                | 203                |
| Glu( $\alpha$ 4)                    | Gln                | 202                | 309                | 209                | 214                | 204                | 206                | 228                | 203                | 214                | 227                | Asp                | Asn                |
| Pro( $\alpha$ 4- $\alpha$ 5'/SEPT3) | Gln                | His                | Gln                | Gln                | Glu                | Gln                | Gln                | Gln                | Gln                | Gln                | 237                | 456                | 224                |
| Gly("G5")                           | 234                | 241                | 348                | 248                | 250                | 239                | 241                | 263                | 238                | 249                | 265                | 483                | 251                |
| Arg( $\beta$ b)                     | 250                | 256                | 363                | 263                | 265                | 254                | 256                | 278                | 253                | 264                | 280                | 498                | 266                |
| Glu( $\alpha$ 6)                    | 292                | 297                | 405                | 305                | 307                | 296                | 298                | 320                | 295                | 306                | 322                | 540                | 308                |
| Arg( $\alpha$ 6)                    | 285                | 300                | 408                | 308                | 310                | 299                | 301                | 323                | 298                | 309                | 325                | 543                | 311                |

**Supplementary Table 2.** Positions of relevant amino acid residues within baker's yeast, fruit fly and *C. elegans* septins. The residue is stated where there is no conservation. Uniprot entries are displayed below each sequence name. Asterisks (\*) represent absent or unidentifiable positions.

| Structural position                 | <i>S. cerevisiae</i> |                    |                   |                    |                    | <i>D. melanogaster</i> |                    |                    |                    |                    | <i>C. elegans</i>  |                    |
|-------------------------------------|----------------------|--------------------|-------------------|--------------------|--------------------|------------------------|--------------------|--------------------|--------------------|--------------------|--------------------|--------------------|
|                                     | Cdc3<br>P32457       | Cdc10<br>P25342    | Cdc11<br>P32458   | Shs1<br>Q07657     | Cdc12<br>P32468    | Sep1<br>P42207         | Sep4<br>Q7KUX3     | Sep2<br>P54359     | Sep5<br>Q7KLG8     | Pnut<br>P40797     | Unc-59<br>Q9U334   | Unc-61<br>Q25AR8   |
| Gly(HL)                             | 101                  | 14                 | 3                 | *                  | 16                 | 17                     | 15                 | 25                 | 28                 | 124                | 29                 | 81                 |
| Phe(HL)                             | 102                  | 15                 | Ile               | *                  | Ile                | 18                     | 16                 | 26                 | 29                 | 125                | 30                 | 82                 |
| Pro( $\alpha$ 0)                    | 106                  | Thr                | Ser               | *                  | 21                 | 22                     | 20                 | 30                 | 33                 | 129                | 34                 | 86                 |
| Phe( $\alpha$ 0)                    | 118                  | 31                 | Ile               | Ile                | Gly                | 34                     | 32                 | 42                 | 45                 | 141                | 46                 | 98                 |
| Glu(P-loop)                         | Pro                  | Gln                | Gln               | Pro                | 42                 | 43                     | 41                 | 51                 | 54                 | Ala                | Arg                | 107                |
| Thr(P-loop/SEPT6)                   | Asp                  | Ser                | Ser               | Ala                | Ser                | Ser                    | Ser                | 52                 | 55                 | Ser                | Ser                | 108                |
| Ser(P-loop)                         | Thr                  | 46                 | 36                | Thr                | Thr                | 49                     | 47                 | 57                 | 60                 | 156                | 61                 | Thr                |
| Ala(Sw1/SEPT2)                      | *                    | *                  | *                 | *                  | *                  | 69                     | Val                | *                  | *                  | Pro                | *                  | *                  |
| His(Sw1/SEPT6)                      | *                    | *                  | *                 | *                  | *                  | *                      | *                  | 75                 | 78                 | *                  | *                  | 131                |
| Thr(Sw1)                            | Lys                  | 74                 | Asp               | Glu                | 75                 | 76                     | 74                 | Ser                | Asn                | 183                | 89                 | 135                |
| Asp(Sw2)                            | 204                  | 97                 | 89                | Met                | 98                 | 99                     | 97                 | 102                | 105                | 206                | 112                | Glu                |
| GlyI(Sw2)                           | 207                  | 100                | 92                | 138                | 101                | 102                    | 100                | 105                | 108                | 209                | 115                | 161                |
| Aro(Sw2)                            | 208 <sup>Phe</sup>   | 101 <sup>Phe</sup> | 93 <sup>Phe</sup> | Ile                | 102 <sup>Phe</sup> | 103 <sup>Phe</sup>     | 101 <sup>Phe</sup> | 106 <sup>Tyr</sup> | 109 <sup>Tyr</sup> | 210 <sup>Phe</sup> | 116 <sup>Phe</sup> | 162 <sup>Phe</sup> |
| GlyII(Sw2)                          | 209                  | 102                | 94                | 140                | 103                | 104                    | 102                | 107                | 110                | 211                | 117                | 163                |
| Asx(Sw2)                            | 213 <sup>Asn</sup>   | 106 <sup>Asp</sup> | 98 <sup>Asp</sup> | 144 <sup>Asp</sup> | 107 <sup>Asn</sup> | 108 <sup>Asp</sup>     | 106 <sup>Asn</sup> | 111 <sup>Asn</sup> | 114 <sup>Asn</sup> | 215 <sup>Asp</sup> | 121 <sup>Asn</sup> | 167 <sup>Asp</sup> |
| Asn(Sw2)                            | 214                  | 107                | 99                | Asp                | 108                | 109                    | Cys                | Lys                | Lys                | 216                | 122                | Lys                |
| Glu( $\alpha$ 2)                    | 237                  | 129                | 121               | 167                | 130                | 131                    | 129                | 134                | 137                | 238                | 144                | 190                |
| Arg(PB2)                            | 242                  | 134                | 126               | 172                | 135                | 136                    | 134                | 139                | 142                | 243                | 149                | 195                |
| Phe(Tr1/SEPT2)                      | Thr                  | Asn                | Thr               | Thr                | Thr                | 154                    | Trp                | Thr                | Thr                | Ser                | Ser                | Thr                |
| GlyI(Tr1)                           | 261                  | 154                | 146               | 192                | 154                | 155                    | 153                | 160                | 163                | 262                | 169                | 216                |
| His(Tr1)                            | 262                  | Lys                | 147               | 193                | 155                | 156                    | 154                | 161                | 164                | 263                | 170                | 217                |
| GlyII(Tr1/SEPT2)                    | Tyr                  | Glu                | 148               | 194                | 156                | 157                    | Ser                | 162                | 165                | 264                | 173                | 218                |
| Leu(Tr1)                            | 264                  | 157                | 149               | 195                | 157                | 158                    | 156                | 163                | 166                | 265                | 172                | 219                |
| Ser(Tr1/SEPT6)                      | Pro                  | Arg                | Glu               | Glu                | Pro                | Pro                    | Gln                | 165                | Ala                | Pro                | Pro                | Ala                |
| Leu( $\alpha$ 3/SEPT6)              | 269                  | Val                | Val               | Val                | Ile                | Val                    | 161                | 168                | 171                | Ile                | Ile                | 224                |
| Phe( $\alpha$ 3)                    | 271                  | Ala                | 156               | Leu                | Thr                | 165                    | Leu                | Cys                | Cys                | Cys                | Leu                | Thr                |
| Asp(G4)                             | 289                  | 182                | 174               | 220                | 182                | 183                    | 181                | 188                | 191                | 290                | 197                | 244                |
| Glu(Tr2)                            | 295                  | 188                | 180               | 226                | 188                | 189                    | 187                | 194                | 197                | 296                | 203                | 250                |
| Glu( $\alpha$ 4)                    | Gln                  | 199                | Asp               | Asp                | Val                | 200                    | Asp                | 205                | 208                | 307                | Asp                | 261                |
| Pro( $\alpha$ 4- $\alpha$ 5'/SEPT3) | Lys                  | 209                | Asn               | Lys                | Thr                | 210                    | Gln                | Gln                | Gln                | Asp                | Lys                | Thr                |
| Gly("G5")                           | 344                  | 236                | 230               | Thr                | 247                | 239                    | 237                | 240                | 243                | 345                | 251                | 296                |
| Arg( $\beta$ b)                     | 360                  | 251                | 247               | 288                | 263                | 254                    | 252                | 255                | 258                | 360                | 266                | 312                |
| Glu( $\alpha$ 6)                    | 402                  | 293                | 289               | 330                | 305                | 295                    | 294                | 297                | 300                | 402                | 308                | 354                |
| Arg( $\alpha$ 6)                    | 405                  | 296                | 292               | 333                | 308                | 298                    | 297                | 300                | 303                | 405                | 311                | 357                |
